# Supplementary material
Source: Springer Nature journal article supplement (https://www.springermedizin.de/resource/supplementary/13256_2009_1094_MOESM3_ESM.pdf/9646992)

G, IBRAHIMA

H

/1988, M, 20Y

Emotic

2008  
36.41  
A 4

Spin -0  
Tilt 0

A

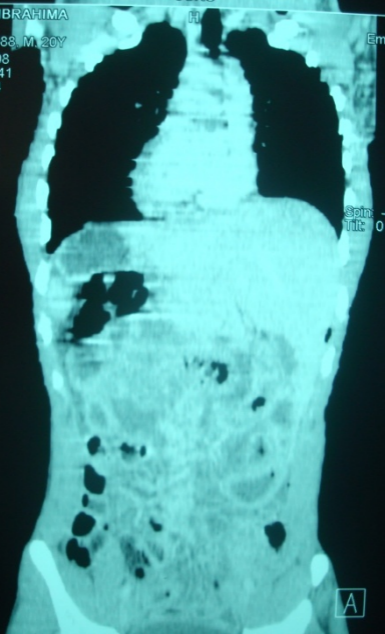

Supplement: MOESM3 [file 9646992]
